# Supplementary material for: Ozone formation potential related to the release of volatile organic compounds (VOCs) and nitrogen oxide (NOX) from a typical industrial park in the Pearl River Delta
Source: Royal Society of Chemistry journal article supplement (doi:10.1039/d4ea00091a), 2024-01-01
Supplement: d4ea00091a1.pdf [file d4ea00091a1.pdf]

## Supplementary material:

### **Ozone formation potential related with release of volatile organic compounds (VOCs) and nitrogen oxide (NO<sub>x</sub>) from a typical industrial park in the Pearl River Delta**

**Taicheng An**<sup>1,2,\*</sup>, **Jiajia Li**<sup>1,2</sup>, **Qinhao Lin**<sup>1,2</sup>, **Guiying Li**<sup>1,2</sup>,

- 1. Guangdong-Hong Kong-Macao Joint Laboratory for Contaminants Exposure and Health, Guangdong Key Laboratory of Environmental Catalysis and Health Risk Control, Institute of Environmental Health and Pollution control, School of Environmental Science and Engineering, Guangdong University of Technology, Guangzhou 510006, China*
- 2. Guangzhou Key Laboratory of Environmental Catalysis and Pollution Control, Key Laboratory of City Cluster Environmental Safety and Green Development of the Ministry of Education, School of Environmental Science and Engineering, Guangdong University of Technology, Guangzhou 510006, China*

\* Corresponding author. E-mail: antc99@gdut.edu.cn (Prof. Taicheng An)

## Text S1

### Measurement of VOCs

The collected VOC samples were detected using an Entech 7100 pre-concentrator (Entech Instruments Inc., CA, USA) and gas chromatography-mass spectrometer (7890A GC-5975C MS, Agilent Technologies, USA) based on the USEPA TO-15 method. Briefly, a volume of 200 mL sample was firstly extracted from each Summa canister to concentrate in the module 1 at -40 °C with liquid nitrogen. After baking at 150 °C, the sample escaped to module 2 and was trapped at -50 °C. Then the concentrated compounds were transferred to module 3 through baking at 220 °C and concentrated again at -180 °C. After 2.5 min, the VOCs were highly focused with quickly desorbed at 120 °C/min and swept into the column for the separation.

The GC oven temperature program used a DB-5 column (60 m × 0.32 mm × 0.25 μm, Agilent Technologies, USA) as followed: initially 35°C for 5 min, programmed to 150°C at a rate of 5 °C/min, and then to 250°C at a rate of 15 °C/min which was maintained for 2 min. The carrier gas is ultrahigh purity helium at a constant flow rate of 1.2 mL/min. Mass spectrometer conditions were set as follows: Ion source: EI source; ionizing energy: 70 eV; scan range: 45 – 260 amu; temperature of the transfer line: 290 °C. We used internal standard calibration to quantify the concentrations of VOCs, which was determined by standard samples Photochemical Assessment Monitoring Stations (PAMS) and TO-15 (Linde Spectra Environment Gases, USA). Bromochloromethane, 1,4-difluorobenzene, chlorobenzene-d5 and 4-bromofluorobenzene were used as internal standards. The detailed steps of the pre-concentration GC-MS method can be found in previous works <sup>1, 2</sup>. Before measurement, all experimental instruments were calibrated. All steps were in accordance with the analytical procedures and the requirements of the TO-15 method compiled by US Environmental Protection Agency, including method detection limits (Table S2), field blanks, retention time, accuracy, accuracy repeats and reference sample analysis.

## Text S2

The O<sub>3</sub> production in the AtChem Online model can be represented by (R1)-(R3):

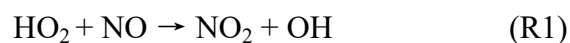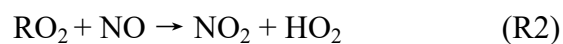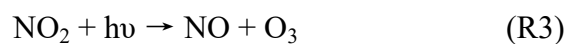

The removed O<sub>3</sub> in the AtChem Online model can be represented by (R4)-(R8):

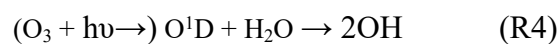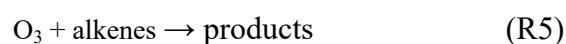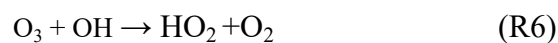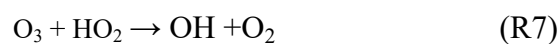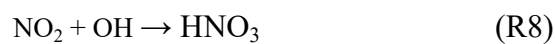

The net photochemical production rate of O<sub>3</sub> P(O<sub>3</sub>) can be expressed as follows:

$$P(\text{O}_3) = k_1[\text{HO}_2][\text{NO}] + k_2[\text{RO}_2][\text{NO}] - k_4[\text{O}^1\text{D}][\text{H}_2\text{O}] - k_5[\text{O}_3][\text{alkenes}] - k_6[\text{O}_3][\text{OH}] - k_7[\text{O}_3][\text{HO}_2] - k_8[\text{NO}_2][\text{OH}]$$

where the k values in the equation represent the reaction rate coefficients of the reactions.

**Table S1** The description of sampling sites

| <b>Site</b> | <b>Longitude</b> | <b>Latitude</b> | <b>Characteristics</b>                                                                                               |
|-------------|------------------|-----------------|----------------------------------------------------------------------------------------------------------------------|
| 1           | 113°31'28"       | 23°9'30"        | Electronic and machine manufacturing, traffic                                                                        |
| 2           | 113°31'39"       | 23°9'23"        | Electronic and machine manufacturing, village                                                                        |
| 3           | 113°31'52"       | 23°8'55"        | Comprehensive utilization of waste resources, textiles, raw material manufacturing, machinery manufacturing, traffic |
| 4           | 113°31'52"       | 23°9'08"        | Printing                                                                                                             |
| 5           | 113°31'53"       | 23°9'16"        | Village, machinery manufacturing                                                                                     |
| 6           | 113°31'46"       | 23°9'24"        | Village                                                                                                              |
| 7           | 113°31'47"       | 23°9'34"        | Village, hill, traffic                                                                                               |
| 8           | 113°32'04"       | 23°9'26"        | Village, transportation                                                                                              |
| 9           | 113°32'16"       | 23°9'29"        | Hill, electronic and machine manufacturing                                                                           |
| 10          | 113°32'25"       | 23°9'24"        | Hill, electronic and machine manufacturing                                                                           |
| 11          | 113°32'26"       | 23°9'13"        | Hill, research and experimental development, transportation                                                          |
| 12          | 113°32'15"       | 23°9'25"        | Electronic and machine manufacturing, research and experimental development, transportation                          |
| 13          | 113°32'15"       | 23°9'15"        | Transportation, research and experimental development                                                                |
| 14          | 113°32'03"       | 23°9'10"        | Electronic and machine manufacturing, pharmaceutical manufacturing, village                                          |
| 15          | 113°32'07"       | 23°9'03"        | Pharmaceutical manufacturing, electronic and machine manufacturing, raw material manufacturing                       |
| 16          | 113°32'18"       | 23°9'03"        | Transportation, machinery manufacturing                                                                              |
| 17          | 113°32'26"       | 23°8'53"        | Pharmaceutical manufacturing, research and experimental development, hill                                            |
| 18          | 113°32'14"       | 23°8'54"        | Research and experimental development, machinery manufacturing, pharmaceutical manufacturing, transportation         |
| 19          | 113°32'03"       | 23°8'55"        | Machinery manufacturing, raw material manufacturing, traffic                                                         |
| 20          | 113°31'37"       | 23°8'55"        | Comprehensive utilization of waste resources, textiles                                                               |
| 21          | 113°31'27"       | 23°8'56"        | Transportation, highway                                                                                              |
| 22          | 113°31'20"       | 23°9'06"        | Chemical process, traffic                                                                                            |
| 23          | 113°31'18"       | 23°9'17"        | Chemical process, traffic, pharmaceutical manufacturing                                                              |
| 24          | 113°31'19"       | 23°9'30"        | Research and experimental development, traffic                                                                       |

**Table S2** R<sup>2</sup>, MDL, MIR and OFP (ppb) of all identified compounds

|          | <b>Compounds</b>           | <b>Mean</b> | <b>SD</b> | <b>MDL</b> | <b>R<sup>2</sup></b> | <b>MIR</b> | <b>OFP</b> |
|----------|----------------------------|-------------|-----------|------------|----------------------|------------|------------|
| HHs (33) | Dichloromethane            | 3.19        | 1.82      | 0.01       | 0.997                | 0.04       | 3.14       |
|          | 1,2,4-Trichlorobenzene     | 0.78        | 0.96      | 0.48       | 0.994                | 0.00       | NA         |
|          | Trichloroethylene          | 0.54        | 1.58      | 0.02       | 0.991                | 0.64       | 8.32       |
|          | Benzyl chloride            | 0.44        | 0.32      | 0.09       | 0.998                | 0.00       | NA         |
|          | hexachloro-1,3-Dutadiene   | 0.39        | 0.91      | 0.03       | 0.996                | 0.32       | 3.01       |
|          | p-Dichlorobenzene          | 0.39        | 0.83      | 0.12       | 0.997                | 0.18       | 1.67       |
|          | Freon12                    | 0.36        | 0.23      | 0.21       | 0.998                | 0.00       | NA         |
|          | 1,2-Dichloroethane         | 0.35        | 0.32      | 0.14       | 0.996                | 0.21       | 1.78       |
|          | 1,3-Dichlorobenzene        | 0.30        | 0.70      | 0.07       | 0.996                | 0.00       | NA         |
|          | o-Dichlorobenzene          | 0.27        | 0.60      | 0.19       | 0.998                | 0.18       | 1.15       |
|          | 1,2-Dibromoethane          | 0.22        | 0.64      | 0.08       | 0.995                | 0.10       | 0.55       |
|          | cis-1,3-Dichloropropene    | 0.20        | 0.36      | 0.13       | 0.998                | 3.70       | 18.15      |
|          | Freon11                    | 0.19        | 0.08      | 0.19       | 0.99                 | 0.00       | NA         |
|          | Chlorobenzene              | 0.12        | 0.31      | 0.01       | 0.991                | 0.32       | 0.94       |
|          | cis-1,2-Dichloroethylene   | 0.10        | 0.15      | 0.10       | 0.998                | 1.70       | 4.17       |
|          | 1,1,2,2-Tetrachloroethane  | 0.10        | 0.32      | 0.07       | 0.992                | 0.00       | NA         |
|          | Ethylidene chloride        | 0.08        | 0.04      | 0.03       | 0.995                | 0.07       | 0.13       |
|          | Tribromomethane            | 0.07        | 0.23      | 0.04       | 0.995                | 0.00       | NA         |
|          | Carbon tetrachloride       | 0.07        | 0.04      | 0.06       | 0.998                | 0.00       | NA         |
|          | Perchloroethylene          | 0.06        | 0.11      | 0.02       | 0.999                | 0.03       | 0.04       |
|          | trans-1,2-Dichloroethylene | 0.05        | 0.17      | 0.01       | 0.998                | 1.70       | 2.22       |
|          | 1,1,2-Trichloroethane      | 0.05        | 0.15      | 0.02       | 0.993                | 0.09       | 0.10       |
|          | Chloroform                 | 0.05        | 0.08      | 0.01       | 0.995                | 0.02       | 0.02       |
|          | Dibromochloromethane       | 0.04        | 0.12      | 0.03       | 0.998                | 0.00       | NA         |
|          | Bromdichlormethan          | 0.04        | 0.09      | 0.03       | 0.998                | 0.00       | NA         |
|          | 1,2-Dichloropropane        | 0.03        | 0.04      | 0.02       | 0.996                | 0.29       | 0.23       |
|          | Freon113                   | ND          | ND        | 0.12       | 0.995                | 0.00       | NA         |

|                        |                        |      |       |       |       |       |        |
|------------------------|------------------------|------|-------|-------|-------|-------|--------|
|                        | Freon114               | ND   | ND    | 0.40  | 0.993 | 0.00  | NA     |
|                        | Chloroethane           | ND   | ND    | 0.41  | 0.994 | 0.29  | NA     |
|                        | 1,1,1-Trichloroethane  | ND   | ND    | 0.19  | 0.999 | 0.00  | NA     |
|                        | Methyl bromide         | ND   | ND    | 0.66  | 0.997 | 0.02  | NA     |
|                        | Chloroethylene         | ND   | ND    | 0.25  | 0.997 | 2.83  | NA     |
|                        | 1,1-Dichloroethene     | ND   | ND    | 0.20  | 0.993 | 1.79  | NA     |
| Alkanes (19)           | Undecane               | 3.84 | 14.89 | 1.97  | 0.997 | 0.61  | 56.25  |
|                        | Isopentane             | 3.34 | 3.08  | 0.30  | 0.998 | 1.45  | 116.32 |
|                        | n-Hexane               | 1.77 | 3.27  | 0.92  | 0.996 | 1.24  | 52.53  |
|                        | 3-Methylpentane        | 1.34 | 1.70  | 0.15  | 0.995 | 1.80  | 57.80  |
|                        | Decane                 | 0.53 | 0.73  | 0.46  | 0.996 | 0.68  | 8.67   |
|                        | 2,3-Dimethylbutane     | 0.40 | 0.24  | 0.29  | 0.994 | 0.97  | 9.28   |
|                        | 3-Methylhexane         | 0.37 | 0.15  | 0.22  | 0.994 | 1.61  | 14.20  |
|                        | 2,2,4-Trimethylpentane | 0.32 | 0.30  | 0.32  | 0.998 | 1.26  | 9.60   |
|                        | Methylcyclohexane      | 0.31 | 0.08  | 0.29  | 0.995 | 1.70  | 12.46  |
|                        | n-Heptane              | 0.30 | 0.08  | 0.19  | 0.999 | 1.07  | 7.78   |
|                        | 2-Methylheptane        | 0.30 | 0.12  | 0.28  | 0.995 | 1.07  | 7.76   |
|                        | 2,4-Dimethylpentane    | 0.26 | 0.23  | 0.23  | 0.994 | 1.55  | 9.77   |
|                        | Cyclohexane            | 0.26 | 0.08  | 0.17  | 0.996 | 1.25  | 7.81   |
|                        | n-Octane               | 0.22 | 0.06  | 0.21  | 0.996 | 0.90  | 4.86   |
|                        | 3-Methylheptane        | 0.21 | 0.02  | 0.20  | 0.997 | 1.24  | 6.39   |
|                        | Methylcyclopentane     | 0.19 | 0.16  | 0.06  | 0.996 | 2.19  | 10.15  |
| 2,3-Dimethylpentane    | 0.19                   | 0.07 | 0.02  | 0.99  | 1.34  | 6.21  |        |
| 2,3,4-Trimethylpentane | 0.18                   | 0.05 | 0.11  | 0.999 | 1.03  | 4.40  |        |
| 2,2-Dimethylbutane     | 0.09                   | 0.08 | 0.01  | 0.997 | 1.17  | 2.53  |        |
| Alkenes (8)            | Isoprene               | 1.83 | 1.27  | 0.45  | 0.995 | 10.61 | 466.80 |
|                        | 1-Hexene               | 1.57 | 3.01  | 0.62  | 0.998 | 5.49  | 206.23 |
|                        | 1-Pentene              | 0.73 | 0.43  | 0.36  | 0.998 | 7.71  | 134.81 |
|                        | trans-2-Butene         | 0.70 | 0.59  | 0.52  | 0.995 | 15.16 | 254.69 |

|           |                        |      |      |      |       |       |        |
|-----------|------------------------|------|------|------|-------|-------|--------|
|           | cis-2-Butene           | 0.39 | 0.39 | 0.28 | 0.996 | 14.24 | 134.28 |
|           | cis-2-Pentene          | 0.17 | 0.12 | 0.11 | 0.996 | 10.38 | 43.20  |
|           | trans-2-Pentene        | 0.15 | 0.16 | 0.06 | 0.995 | 10.56 | 37.23  |
|           | Butadiene              | ND   | ND   | 0.29 | 0.998 | 12.61 | 25.48  |
| AHs (18)  | Toluene                | 1.52 | 0.96 | 0.53 | 0.993 | 4.00  | 145.79 |
|           | Naphthalene            | 1.15 | 1.00 | 0.93 | 0.999 | 3.34  | 91.88  |
|           | m-Xylene               | 0.83 | 0.67 | 0.16 | 0.998 | 9.75  | 195.33 |
|           | p-Xylene               | 0.69 | 0.32 | 0.04 | 0.998 | 5.84  | 96.29  |
|           | p-Diethyl benzene      | 0.64 | 1.54 | 0.31 | 0.997 | 4.43  | 68.23  |
|           | Ethylbenzene           | 0.54 | 0.28 | 0.18 | 0.997 | 3.04  | 39.72  |
|           | 1,2,4-Trimethylbenzene | 0.53 | 0.34 | 0.15 | 0.995 | 8.87  | 112.52 |
|           | 1,3-Diethylbenzene     | 0.52 | 1.18 | 0.21 | 0.991 | 7.10  | 88.26  |
|           | o-Xylene               | 0.47 | 0.32 | 0.22 | 0.998 | 7.64  | 86.61  |
|           | 1,2,3-Trimethylbenzene | 0.35 | 0.67 | 0.36 | 0.995 | 11.97 | 101.95 |
|           | Styrene                | 0.34 | 0.34 | 0.09 | 0.992 | 1.73  | 14.16  |
|           | m-Ethyltoluene         | 0.33 | 0.30 | 0.35 | 0.992 | 7.39  | 59.00  |
|           | o-Ethyltoluene         | 0.33 | 0.32 | 0.31 | 0.997 | 5.59  | 44.50  |
|           | p-Ethyltoluene         | 0.33 | 0.28 | 0.19 | 0.996 | 4.44  | 34.64  |
|           | 1,3,5-Trimethylbenzene | 0.28 | 0.27 | 0.36 | 0.996 | 11.76 | 79.54  |
|           | Benzene                | 0.28 | 0.09 | 0.16 | 0.997 | 0.72  | 4.82   |
|           | n-Propylbenzene        | 0.21 | 0.13 | 0.14 | 0.995 | 2.03  | 10.24  |
|           | Isopropylbenzene       | 0.14 | 0.07 | 0.30 | 0.993 | 2.52  | 8.34   |
| OVOCs (3) | Tetrahydrofuran        | 0.17 | 0.25 | 0.05 | 0.991 | 4.31  | 17.75  |
|           | MTBE                   | 0.73 | 0.51 | 0.34 | 0.99  | 0.73  | 12.74  |
|           | 2-Butanone             | 1.45 | 1.65 | 0.24 | 0.993 | 6.01  | 209.15 |
| Other (1) | Carbon disulfide       | 0.20 | 0.25 | 0.10 | 0.997 | 0.25  | 1.19   |

Note: MDL: method detection limitation; R<sup>2</sup>: the correlation coefficient for linear fitting of standard curve; ND: Not detected; NA: Not available.

**Table S3** Concentrations of VOCs in the Pearl River Delta

| Sites                   | Category   | Period                      | Concentration    | species<br>Number | Top 10 species                                                                                                                       |
|-------------------------|------------|-----------------------------|------------------|-------------------|--------------------------------------------------------------------------------------------------------------------------------------|
| Guangzhou <sup>a</sup>  | Industrial | June 2020                   | 41 ± 24 ppb      | 81                | Undecane, isopentane, dichloromethane, isoprene, 1-Hexene, Toluene, 2-Butanone, 3-Methylpentane, naphthalene, m-Xylen                |
|                         | Urban      |                             | 88.8 ± 38.6 ppbv | 56                | Ethane, propane, i-Butane, n-Butane, i-Pentane, ethene, ethyne, benzene, toluene, m/p-Xylene                                         |
| PRD <sup>b</sup>        | Suburban   | April 2005                  | 60.8 ± 31.5 ppbv | 56                | Toulene, ethyne, ethane, propane, i-Butane, n-Butane, i-Pentane, wthene, benzene, ethylbenzene, m/p-Xylene                           |
|                         | Rural      |                             | 23.4 ± 9.8 ppbv  | 56                | Ethane, propane, i-Butane, n-Butane, i-Pentane, ethene, toluene, ethyne, benzene, m/p-Xylene                                         |
| PRD <sup>c</sup>        | Suburban   | July 2006                   | 19.6 ± 12.0 ppbv | 56                | Propane, n-Butane, ethene, isoprene, acetylene, benzene, toluene, m,p-Xylene, formaldehyde, acetaldehyde.                            |
| Wanqingsha <sup>d</sup> | Suburban   | September-<br>November 2017 | 36.3 ± 27.9 ppb  | 56                | Ethane, propane, n-butane, i-butane, i-pentane, n-pentane, ethyne, toluene, ethylbenzene, m/p -xylene.                               |
| Guangzhou <sup>e</sup>  | Urban      | March and May<br>2017       | 55.0 ppb         | 80                | Toluene , methanol , ascetic acid , propionic acid, benzene, ethylbenzene and Σ(o/m/p)-xylene, n-hexane, isopentane, dichloromethane |
|                         | Suburban   |                             | 24.5 ppb         | 80                | Propene , butene , methanol , acetaldehyde , methyl ethyl ketone, benzene, toluene, ethylbenzene and Σ(o/m/p)-xylene, n-hexane       |

N.A.: not available. a, this study; b <sup>3</sup>; c <sup>4</sup>; d <sup>5</sup>; e <sup>2</sup>



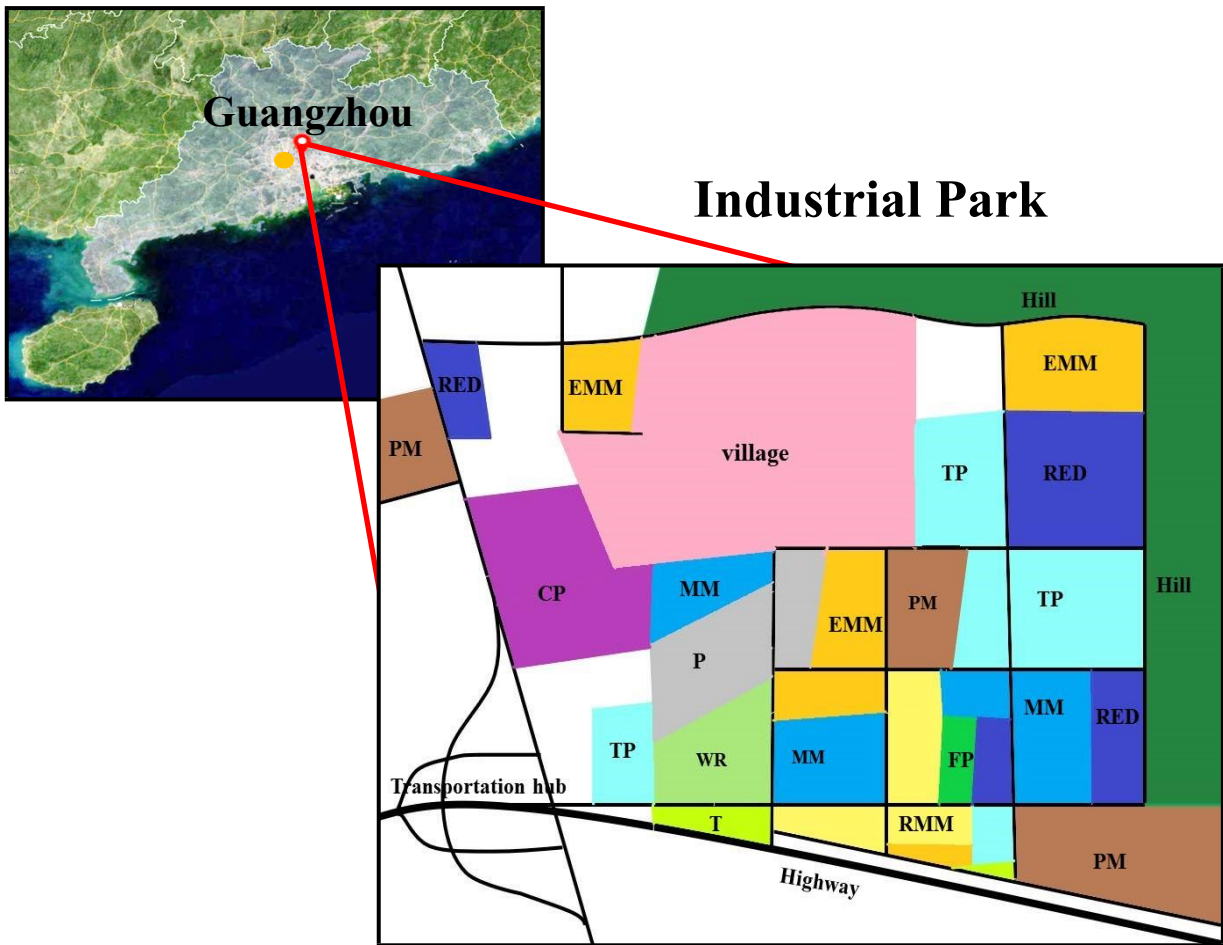

**Fig. S1** Geographical location of the industrial park: Raw material manufacturing (RMM), machinery manufacturing (MM), chemical process (CP), comprehensive utilization of waste resources (WR), printing (P), textiles (T), food processing (FP), pharmaceutical manufacturing (PM), transportation (TP), electronic and machine manufacturing (EMM), research and experimental development (RED). The lines represent the roadways.

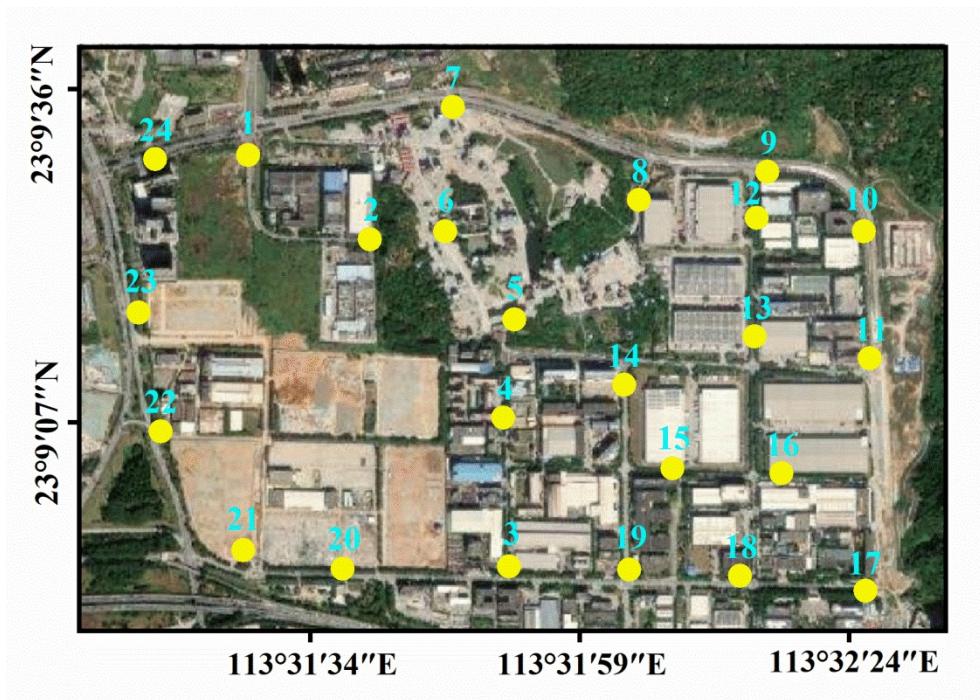

Fig. S2 Geographical location and layout of sampling points.

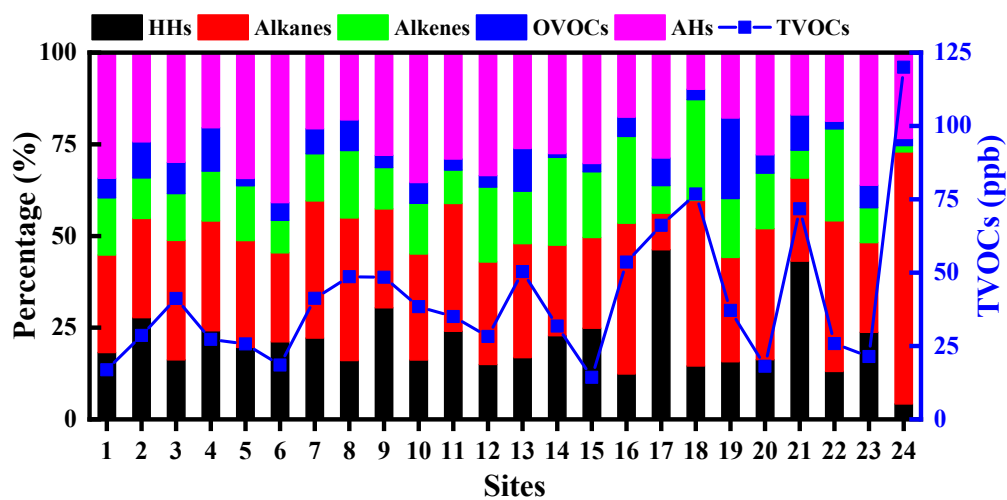

Fig. S3 The concentration level of total VOCs and the ratio of VOC composition.

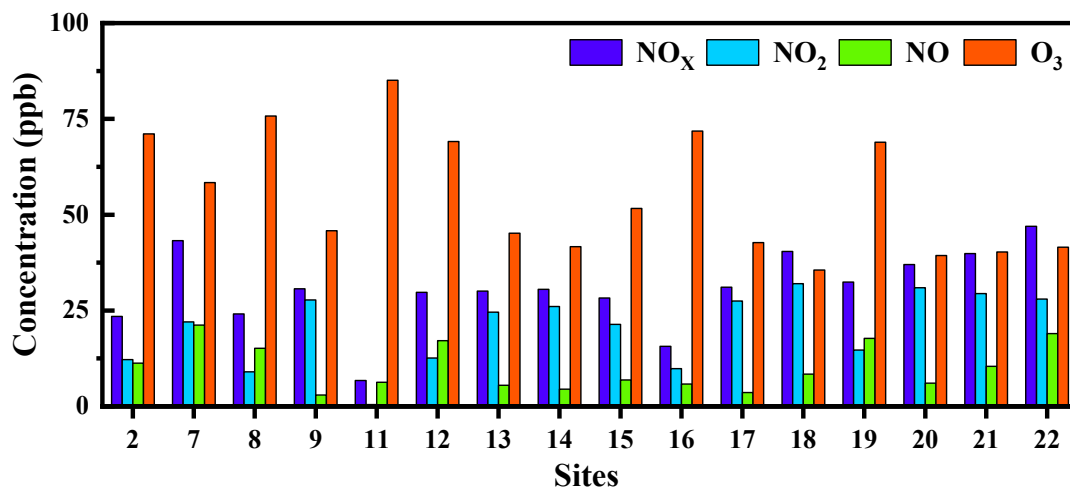

Fig. S4 The concentrations of NO<sub>x</sub> and ozone.

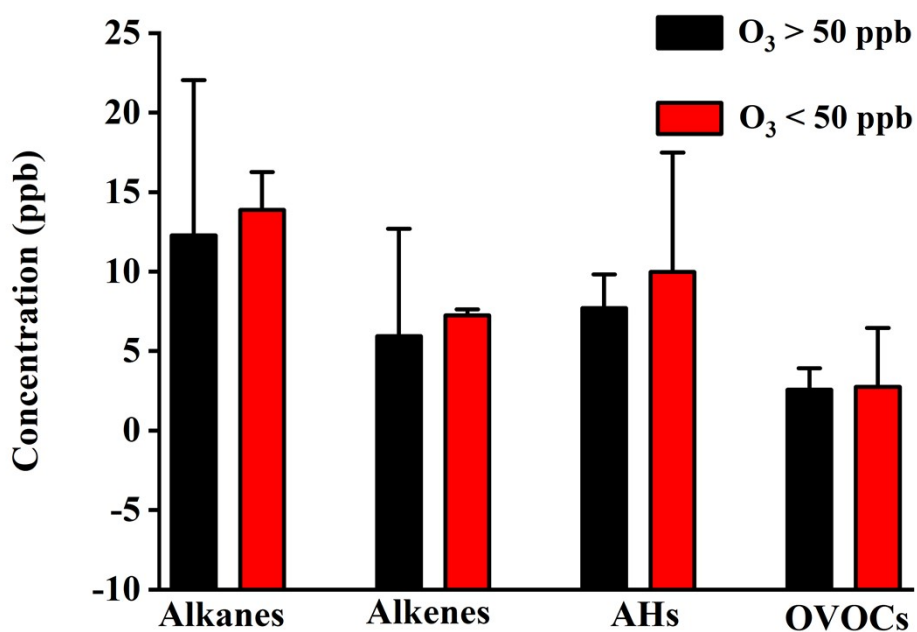

Fig. S5 The concentrations of alkanes, alkenes, AHs and OVOCs in the high and low O<sub>3</sub> regions.

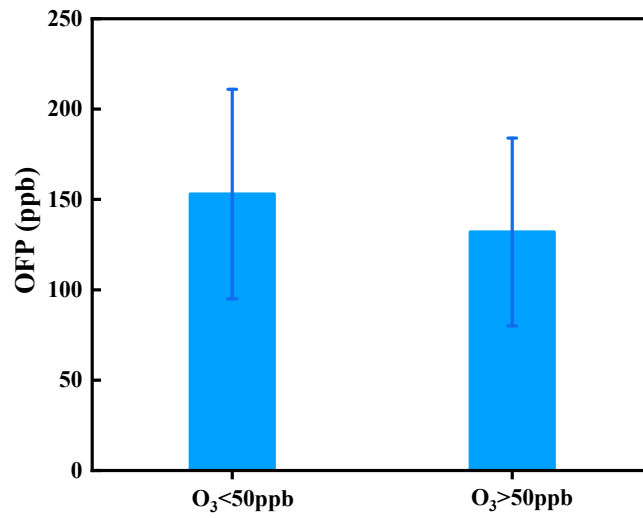

**Fig. S6** The description of the values of Ozone formation potential (OFP) in the high O<sub>3</sub> region and the low O<sub>3</sub> region.

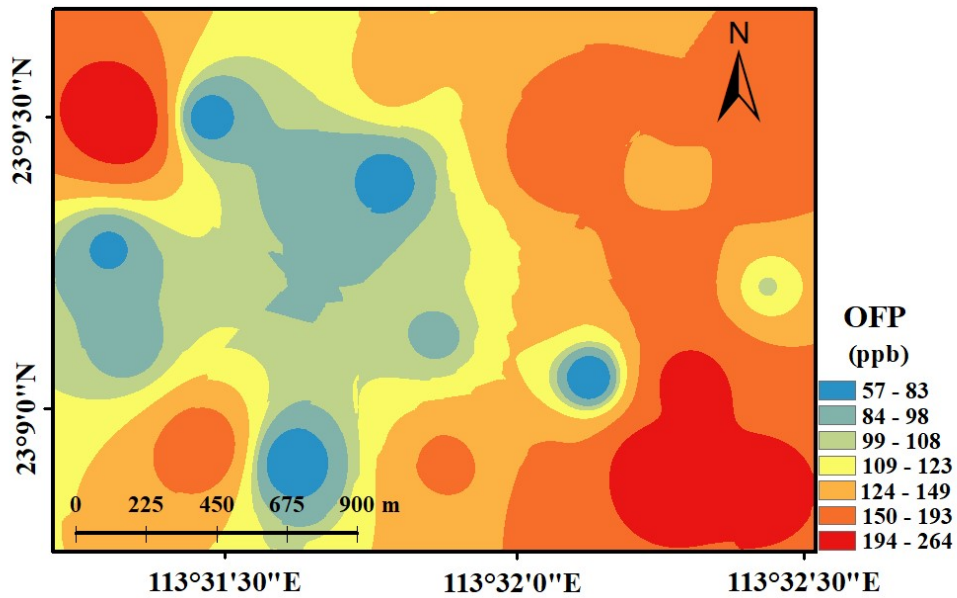

**Fig. S7** The distribution of the values of Ozone formation potential (OFP). The blue to the red represents a gradual increase in concentration.

## References:

1. An, T.; Huang, Y.; Li, G.; He, Z.; Chen, J.; Zhang, C., Pollution profiles and health risk assessment of VOCs emitted during e-waste dismantling processes associated with different dismantling methods. *Environ. Int.* **2014**, *73*, 186-194.
2. Han, C.; Liu, R.; Luo, H.; Li, G.; Ma, S.; Chen, J.; An, T., Pollution profiles of volatile organic compounds from different urban functional areas in Guangzhou China based on GC/MS and PTR-TOF-MS: Atmospheric environmental implications. *Atmos. Environ.* **2019**, *214*, 116843.
3. Tang, J. H.; Chan, L. Y.; Chan, C. Y.; Li, Y. S.; Chang, C. C.; Liu, S. C.; Wu, D.; Li, Y. D., Characteristics and diurnal variations of NMHCs at urban, suburban, and rural sites in the Pearl River Delta and a remote site in South China. *Atmos. Environ.* **2007**, *41* (38), 8620-8632.
4. Yuan, B.; Chen, W.; Shao, M.; Wang, M.; Lu, S.; Wang, B.; Liu, Y.; Chang, C.-C.; Wang, B., Measurements of ambient hydrocarbons and carbonyls in the Pearl River Delta (PRD), China. *Atmos. Res.* **2012**, *116*, 93-104.
5. Meng, Y.; Song, J.; Zeng, L.; Zhang, Y.; Zhao, Y.; Liu, X.; Guo, H.; Zhong, L.; Ou, Y.; Zhou, Y.; Zhang, T.; Yue, D.; Lai, S., Ambient volatile organic compounds at a receptor site in the Pearl River Delta region: Variations, source apportionment and effects on ozone formation. *J. Environ. Sci.* **2022**, *111*, 104-117.
